# Supplementary material for: Simulating the influence of snow surface processes on soil moisture dynamics and streamflow generation in an alpine catchment
Source: Copernicus journal article supplement (doi:10.5194/hess-21-4053-2017), 2017-08-14
Supplement: Supplementary file [file hess-21-4053-2017-supplement.pdf]

Supplement of Hydrol. Earth Syst. Sci., 21, 4053–4071, 2017  
<https://doi.org/10.5194/hess-21-4053-2017-supplement>  
© Author(s) 2017. This work is distributed under  
the Creative Commons Attribution 3.0 License.

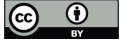

*Supplement of*

## **Simulating the influence of snow surface processes on soil moisture dynamics and streamflow generation in an alpine catchment**

**Nander Wever et al.**

*Correspondence to:* Nander Wever (wever@slf.ch)

The copyright of individual parts of the supplement might differ from the CC BY 3.0 License.

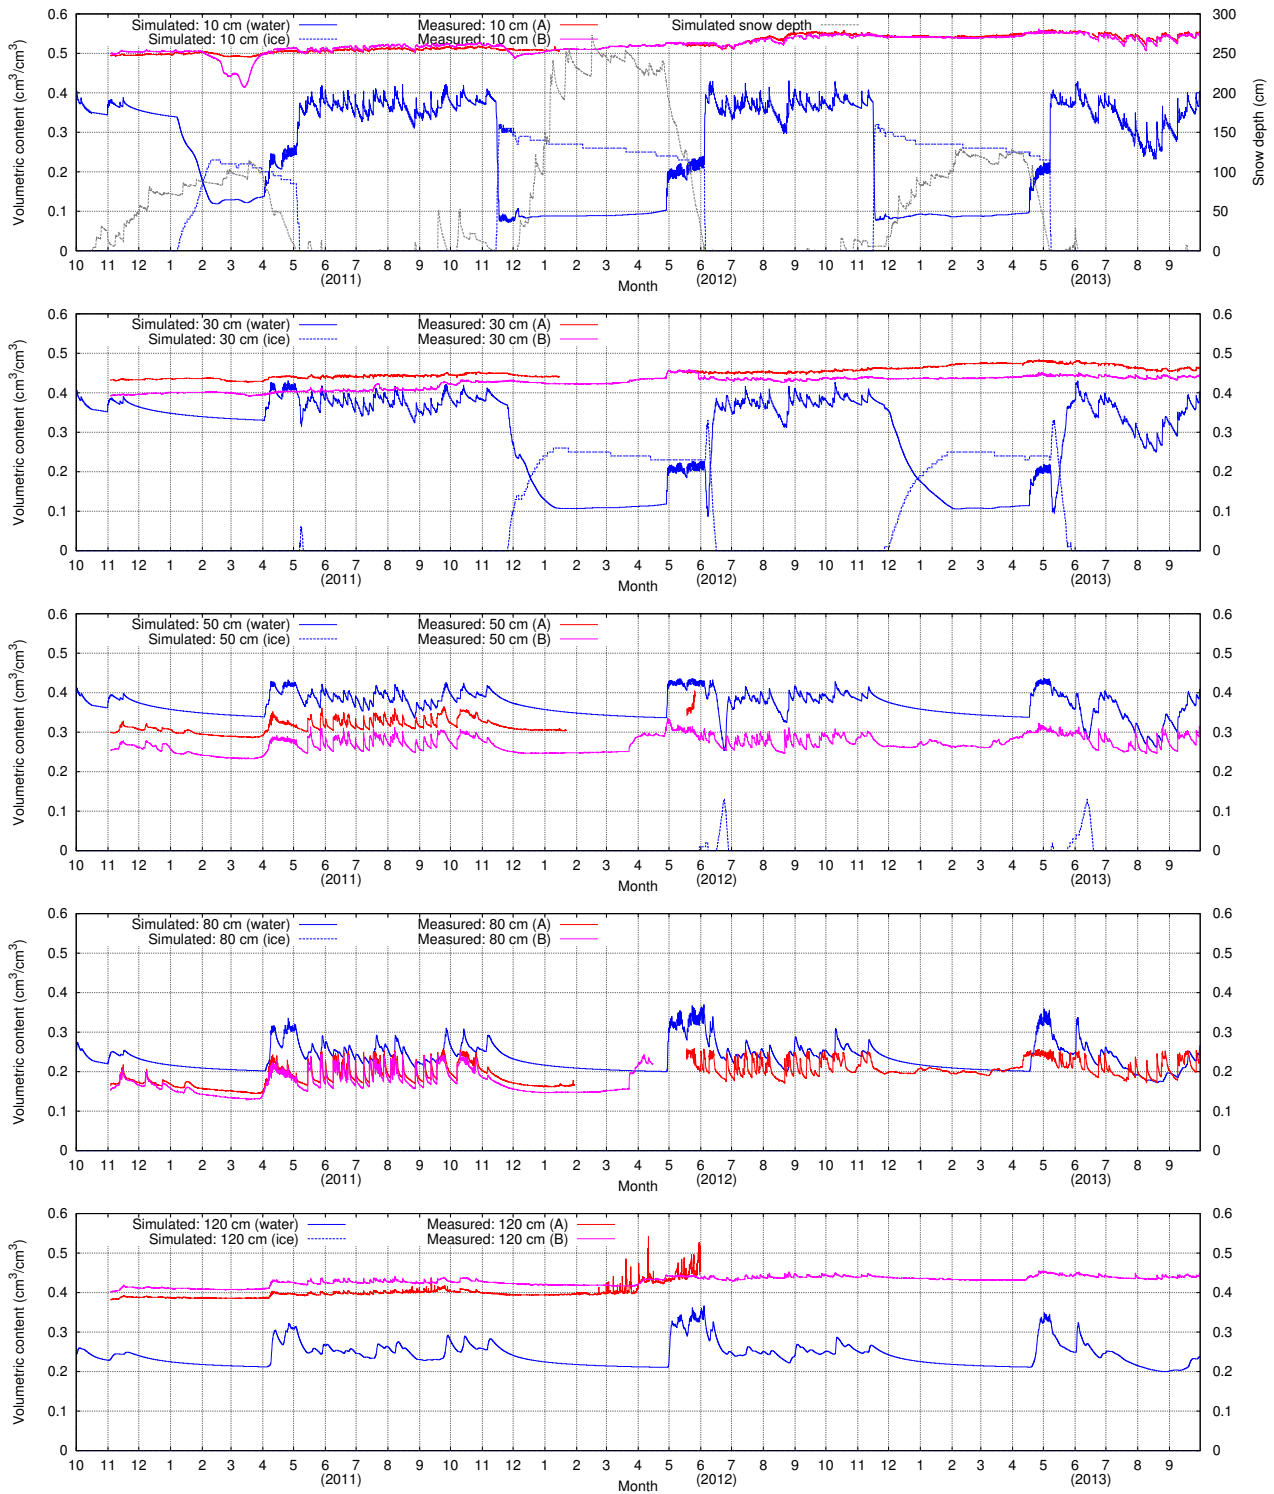

Figure S1: Measured and simulated soil moisture at the IRKIS station Grossalp, for (from top to bottom) 10, 30, 50, 80 and 120 cm depth for the period October 2010 to October 2013. In the upper panel, also simulated snow height is shown.

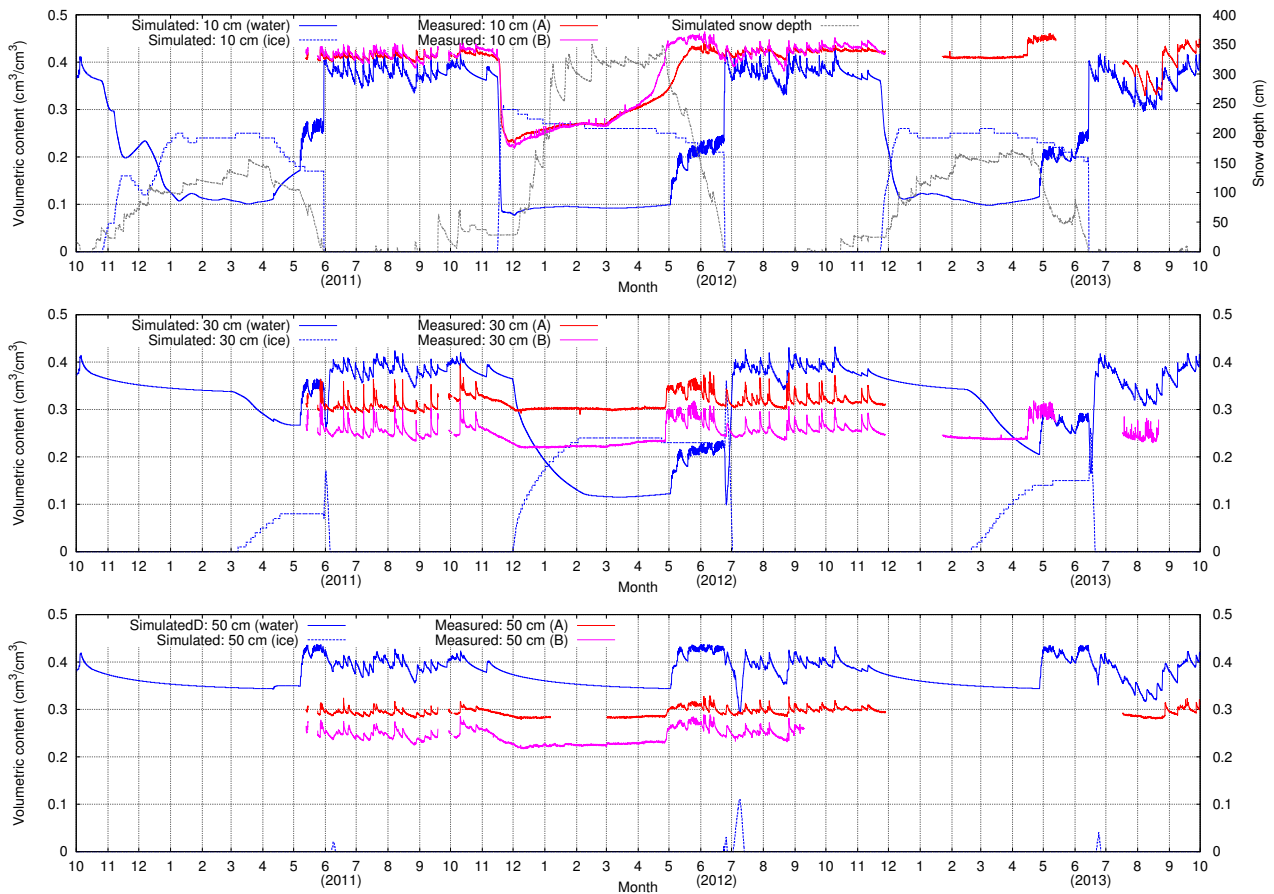

Figure S2: Measured and simulated soil moisture at the SensorScope station Stillberg, for (from top to bottom) 10, 30 and 50 cm depth for the period October 2010 to October 2013. In the upper panel, also simulated snow height is shown.

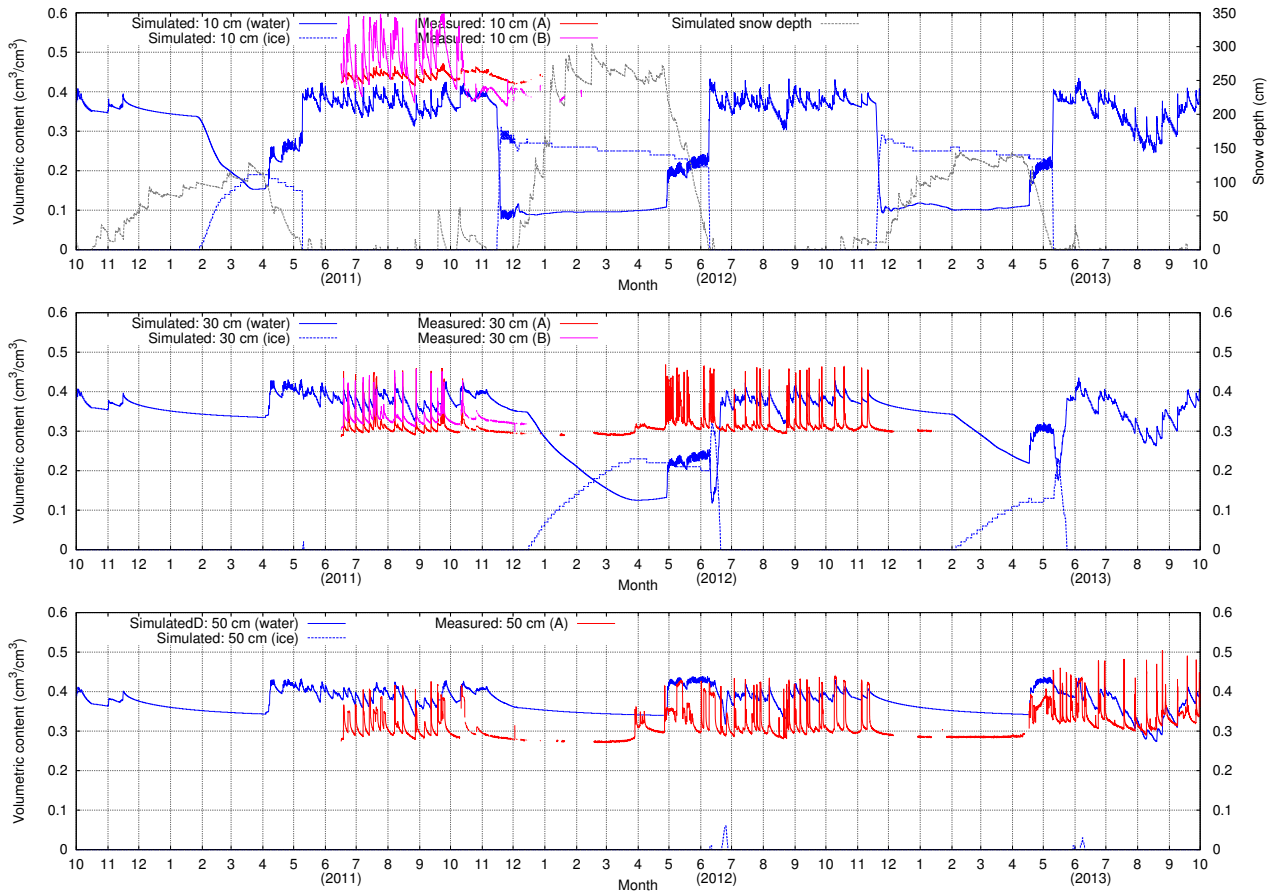

Figure S3: Measured and simulated soil moisture at the SensorScope station Pischa, for (from top to bottom) 10, 30 and 50 cm depth for the period October 2010 to October 2013. In the upper panel, also simulated snow height is shown.

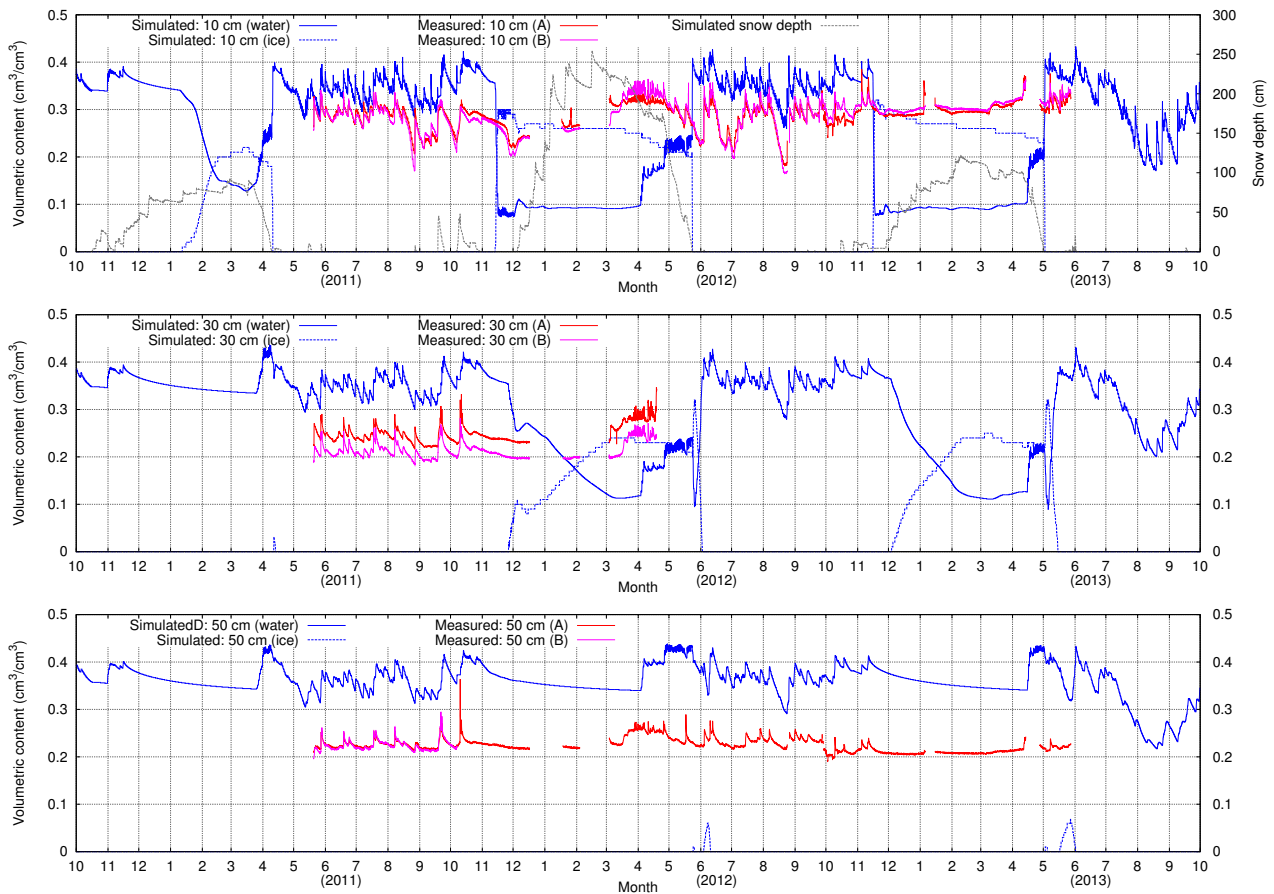

Figure S4: Measured and simulated soil moisture at the SensorScope station Dorjji, for (from top to bottom) 10, 30 and 50 cm depth for the period October 2010 to October 2013. In the upper panel, also simulated snow height is shown.

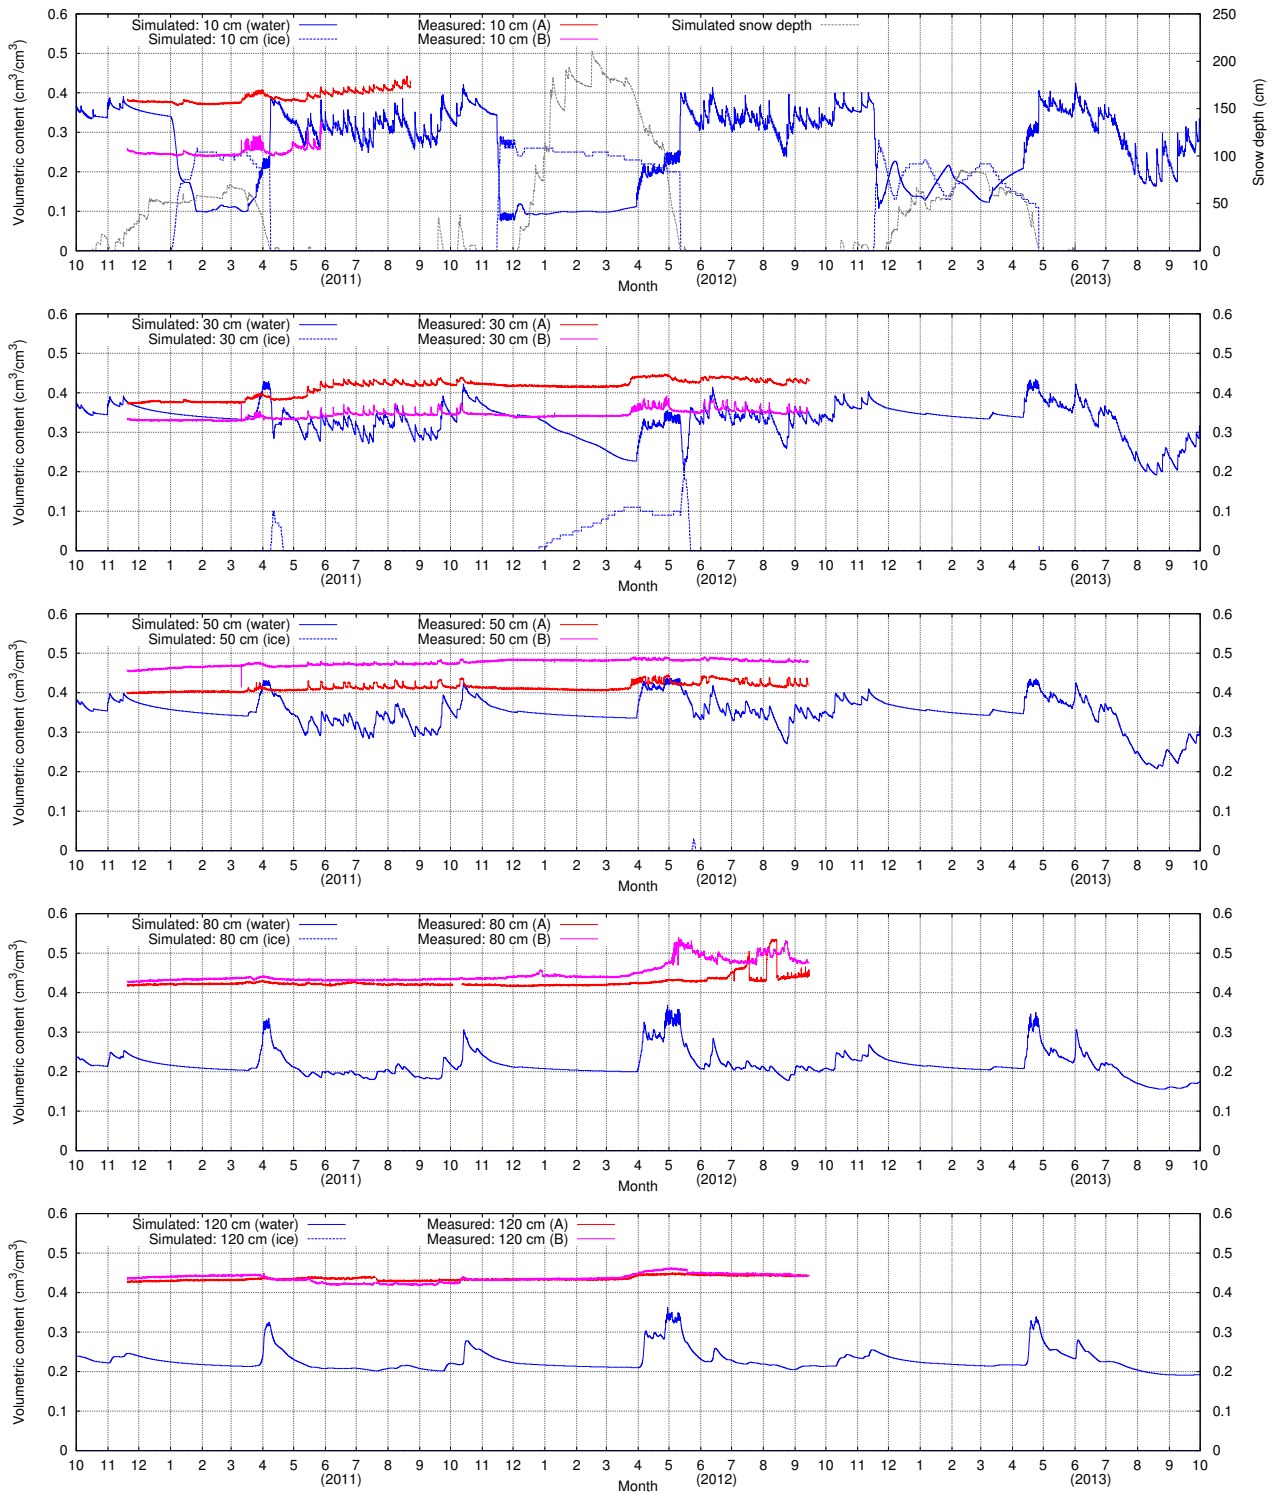

Figure S5: Measured and simulated soil moisture at the SensorScope station Golf Course, for (from top to bottom) 10, 30 and 50 cm depth for the period October 2010 to October 2013. In the upper panel, also simulated snow height is shown.
